# Supplementary material
Source: PubMed Central journal article supplement (PMC3740884)
Supplement: 1302757110_pnas.201302757SI.pdf [file 1302757110_pnas.201302757SI.pdf]

# Supporting Information

Rossi et al. 10.1073/pnas.1302757110

## SI Text

In Table S1, the computational estimates are obtained as follows. The reactant and product molecular configurations are first relaxed separately at the Perdew–Burke–Ernzerhof + van der Waals (PBE+vdW) level of theory (1), using the all-electron program package FHI-aims program package (2). We used tight settings for the numeric atom-centered orbital basis sets and integration grids, as explained elsewhere (2). Following relaxation, the complex geometries are subjected to a single point calculation using the hybrid PBE0 (3, 4) +vdW functional, which yields their electronic energies,  $E$ . The Gibbs free energy of each complex is then estimated using the ideal gas thermodynamic relationship,  $G = F + k_B T$ , where  $k_B$  is the Boltzmann constant,  $T = 298$  K, and  $F$  is the Helmholtz free energy. Assuming that the coupling between translational, vibrational, and rotational degrees of freedom can be neglected,  $F$  is estimated as a sum of their independent contributions (5); that is,  $F = F_{trans} + F_{vib} + F_{rot}$ , where

$$F_{trans} = -k_B T \left[ \ln \left( \frac{mk_B T}{2\pi\hbar^2} \right)^{3/2} + \ln \frac{k_B T}{P} + 1 \right],$$

1. Tkatchenko A, Scheffler M (2009) Accurate molecular van der Waals interactions from ground-state electron density and free-atom reference data. *Phys Rev Lett* 102(7):073005.
2. Blum V, et al. (2009) Ab initio molecular simulations with numeric atom-centered orbitals. *Comput Phys Commun* 180(11):2175–2196.

$$F_{vib} = E + \sum_i^{3N-6} \left[ \frac{\hbar\omega_i}{2} + k_B T \ln \left( 1 - \exp \frac{-\hbar\omega_i}{k_B T} \right) \right],$$

and

$$F_{rot} = -\frac{3}{2} k_B T \ln \left[ \frac{2k_B T}{\hbar^2} (I_A I_B I_C)^{1/3} \pi^{1/3} \right].$$

In the expressions above,  $N$  is the number of atoms in the molecule;  $I_A$ ,  $I_B$ , and  $I_C$  are the molecular moments of inertia;  $P = 1$  atmosphere;  $m$  is the molecular mass; and  $\omega_i$  are the harmonic vibrational frequencies obtained from a Hessian analysis of the PBE+vdW energy surface. The reaction free energy changes,  $\Delta G$ , are then obtained by subtracting the free energies of reactant complexes from the product complexes; that is,  $\Delta G = \sum n_p G_p - \sum n_r G_r$ , where  $n_p$  and  $n_r$  are the stoichiometries of the products and reactants. We find that computed values agree with experiments. The inclusion of dispersion vdW interactions is crucial, as shown by the amount of dispersion energy,  $\Delta E_{vdW} = \Delta E_{\text{PBE0+vdW}} - \Delta E_{\text{PBE0}}$ , in each computed reaction free energy change in Table S1.

3. Ernzerhof M, Scuseria GE (1999) Assessment of the Perdew–Burke–Ernzerhof exchange–correlation functional. *J Chem Phys* 110(11):5029–5036.
4. Adamo C, Barone V (1999) Toward reliable density functional methods without adjustable parameters: The pbe0 model. *J Chem Phys* 110(13):6158–6170.
5. Donald McQuarrie (2000) *Statistical Mechanics* (University Science Books, Mill Valley, CA).

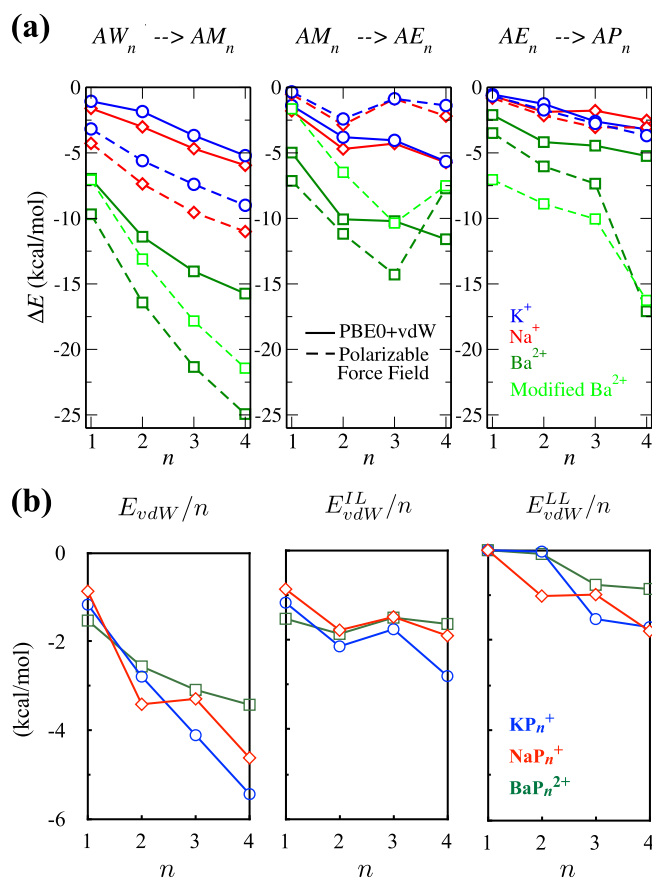

**Fig. S1.** (A) Comparison of substitution reaction energy change ( $\Delta E$ ) obtained from PBE+vdW (1) and a polarizable force field (2–4). The  $\Delta E$  values are estimated for the substitution reactions studied in Fig. 2, and they are computed using geometries relaxed separately at the respective levels of theory. Geometry relaxations using PBE+vdW are carried out using the FHI-aims program (5) as described in *Materials and Methods*, and relaxations using the polarizable force field are carried out using the optimize algorithm of TINKER v6.2 (available at <http://dasher.wustl.edu/ffe/>) with an rms gradient cutoff of 0.001 kcal/mol/Å. Note that we use two separate parameter sets for  $Ba^{2+}$ , one taken from TINKER v4.3 (6) and the other ( $Ba^{2+}$  modified) in which we reduced the  $Ba^{2+}$  damping factor fivefold from 0.39 to 0.078, as suggested by Piquemal et al. (7) and Ponder et al. (8). We find that although a polarizable force field can reproduce the PBE0+vdW trends, the quantitative differences can be large. (B) To understand the origin of these differences, we examine one specific energetic contribution that is not modeled explicitly in the polarizable force field. The atomic  $C_6$  dispersion coefficients are kept fixed in the polarizable force field. In contrast, the  $C_6$  coefficients are variables in the PBE+vdW method that depend on self-consistent electron densities. For example in the ion–propanol complexes, we find that the  $C_6$  coefficients of  $Na^+$ ,  $K^+$ , and  $Ba^{2+}$  vary by factors of  $\sim 8$ ,  $\sim 5$ , and  $\sim 3$ , respectively. To understand the energetic consequences of such variations in  $C_6$  coefficients in ion–propanol complexes, we divide the total dispersion energy ( $E_{vdW}$ ) into intraligand ( $E_{vdW}^L$ ), ligand–ligand ( $E_{vdW}^{LL}$ ), and ion–ligand ( $E_{vdW}^{IL}$ ) contributions. We define for a given geometry  $AP_n$ ,  $E_{vdW}(AP_n) = E_{PBE0+vdW}(AP_n) - E_{PBE0}(AP_n)$ ,  $E_{vdW}^L(AP_n) = n \times (E_{PBE0+vdW}(P) - E_{PBE0}(P))$ ,  $E_{vdW}^{LL}(AP_n) = E_{PBE0+vdW}(P_n) - E_{PBE0}(P_n) - E_{vdW}^L(AP_n)$ , and  $E_{vdW}^{IL}(AP_n) = E_{vdW}(AP_n) - E_{vdW}^{LL}(AP_n) - E_{vdW}^L(AP_n)$ . We find that  $E_{vdW}^{IL}$  increases nonlinearly with the number of propanols in the complex and that, in fact, the  $E_{vdW}^{IL}$  values are correlated strongly with the ion  $C_6$  coefficients (Pearson correlations  $> 0.96$ ). This suggests that the differences between PBE+vdW and the polarizable force field can emerge from the differences in the descriptions of dispersion interactions. The convergence with PBE+vdW may be improved by introducing  $C_6$  coefficient variability in polarizable fields.

1. Tkatchenko A, Scheffler M (2009) Accurate molecular van der Waals interactions from ground-state electron density and free-atom reference data. *Phys Rev Lett* 102(7):073005.
2. Ren P, Ponder JW (2003) Polarizable atomic multipole water model for molecular mechanics simulation. *J Phys Chem B* 107(24):5933–5947.
3. Grossfield A, Ren P, Ponder JW (2003) Ion solvation thermodynamics from simulation with a polarizable force field. *J Am Chem Soc* 125(50):15671–15682.
4. Ren P, Wu C, Ponder JW (2011) Polarizable atomic multipole-based molecular mechanics for organic molecules. *J Chem Theory Comput* 7(10):3143–3161.
5. Blum V, et al. (2009) Ab initio molecular simulations with numeric atom-centered orbitals. *Comput Phys Commun* 180(11):2175–2196.
6. TINKER—Software Tools for Molecular Design, Version 4.3 (J. Ponder Lab, Washington University, St. Louis).
7. Piquemal JP, et al. (2006) Towards accurate solvation dynamics of divalent cations in water using the polarizable amoeba force field: From energetics to structure. *J Chem Phys* 125(5):054511.
8. Ponder JW, et al. (2010) Current status of the AMOEBA polarizable force field. *J Phys Chem B* 114(8):2549–2564.

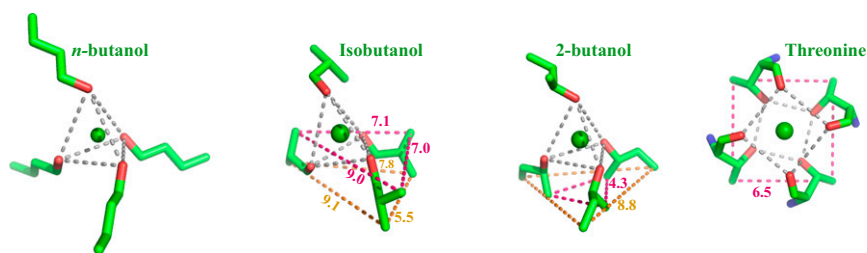

**Fig. S2.** Optimized configurations of representative fourfold butanol complexes compared with the S4 site. The central ion in each case is  $\text{Ba}^{2+}$ . The dashed lines serve as visual aids. The gray lines indicate the coordination geometry, and the magenta/orange lines indicate the distances between the branched methyl groups of adjacent ligands. All distances are in Å. We note that the packing of the branched methyl group of threonine in the S4 site of KcsA is intermediate between the packing of branched methyl groups in fourfold complexes composed of 2-butanols and isobutanols.

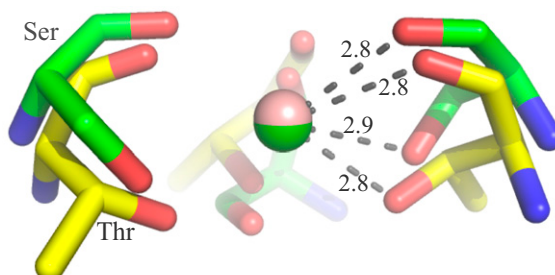

**Fig. S3.** Superimposed optimized configurations of the  $\text{BaT}_4$  and  $\text{BaS}_4$  complexes. Although the rmsd between the two optimized configurations is 1.01 Å, their coordination geometries are the same. Note that only three of the four bidentate ligands in the complexes are shown. The distances between the coordinating oxygen atoms and ions are in angstroms. Ser, serine; Thr, threonine.

**Table S1. Comparison between experimental and computed reaction free energy changes  $\Delta G$  involving  $\text{Na}^+$ ,  $\text{K}^+$  and  $\text{Ba}^{2+}$  ions forming complexes with water ( $W$ ) and methanol ( $M$ ) molecules**

| Gas phase reaction                                 | Experiment<br>$\Delta G$ | Theory             |                  |
|----------------------------------------------------|--------------------------|--------------------|------------------|
|                                                    |                          | $\Delta G^\dagger$ | $\Delta E_{vdW}$ |
| $\text{Na} + W \rightleftharpoons \text{Na}W$      | -18.8 <sup>‡</sup>       | -17.6              | -0.3             |
| $\text{Na} + 2W \rightleftharpoons \text{Na}W_2$   | -31.9 <sup>‡</sup>       | -32.1              | -0.8             |
| $\text{Na} + 3W \rightleftharpoons \text{Na}W_3$   | -40.9 <sup>‡</sup>       | -42.2              | -1.7             |
| $\text{Na} + 2M \rightleftharpoons \text{Na}M_2$   | -35.5 <sup>§</sup>       | -35.6              | -2.0             |
| $\text{Na} + 3M \rightleftharpoons \text{Na}M_3$   | -44.7 <sup>§</sup>       | -46.2              | -4.8             |
| $\text{K} + W \rightleftharpoons \text{KW}$        | -11.8 <sup>‡</sup>       | -11.8              | -0.7             |
| $\text{K} + 2W \rightleftharpoons \text{KW}_2$     | -20.7 <sup>‡</sup>       | -22.9              | -1.4             |
| $\text{K} + 3W \rightleftharpoons \text{KW}_3$     | -27.0 <sup>‡</sup>       | -28.6              | -2.1             |
| $\text{K} + M \rightleftharpoons \text{KM}$        | -13.4 <sup>¶</sup>       | -13.7              | -1.0             |
| $\text{K} + 2M \rightleftharpoons \text{KM}_2$     | -23.1 <sup>  </sup>      | -23.8              | -3.3             |
| $\text{K} + 3M \rightleftharpoons \text{KM}_3$     | -29.9 <sup>  </sup>      | -29.3              | -5.9             |
| $\text{Ba}W_4 + W \rightleftharpoons \text{Ba}W_5$ | -16.1 <sup>**</sup>      | -14.6              | -1.0             |
| $\text{Ba}W_5 + W \rightleftharpoons \text{Ba}W_6$ | -12.6 <sup>**</sup>      | -14.0              | -0.9             |

$\Delta E_{vdW}$  is the contribution of dispersion energy to the computed  $\Delta G$ . All energies are in units of kcal/mol.

<sup>†</sup>Computed at temperature ( $T$ ) = 298 K, except for the reaction  $\text{K} + M \rightleftharpoons \text{KM}$ , whose free energy was computed at  $T = 443$  K.

<sup>‡</sup>Estimated at  $T = 298$  K and taken from Tissandier et al. (1).

<sup>§</sup>Estimated by adding  $\text{Na}W_n + nM \rightleftharpoons \text{Na}M_n + nW$  substitution reaction free energies obtained at  $T = 303$  K (2) to corresponding  $\text{Na}W_n$  complexation energies obtained at  $T = 298$  K (1).

<sup>¶</sup>Estimated by adding the  $\text{KW} + M \rightleftharpoons \text{KM} + W$  reaction free energy obtained at  $T = 443$  K to the  $\text{KW}$  complexation energy taken from ref. 2.

<sup>||</sup>Estimated by adding  $\text{KW}_n + nM \rightleftharpoons \text{KM}_n + nW$  substitution reaction free energies obtained at  $T = 302$  K (2) to corresponding  $\text{KW}_n$  complexation energies obtained at  $T = 298$  K (1).

<sup>\*\*</sup>Estimated at  $T = 298$  K and taken from ref. 3.

1. Tissandier MD, et al. (1998) The proton's absolute aqueous enthalpy and Gibbs free energy of solvation from cluster-ion solvation data. *J Phys Chem A* 102(40):7787–7794.
2. Nielsen SB, Masella M, Kebarle P (1999) Competitive gas-phase solvation of alkali metal ions by water and methanol. *J Phys Chem A* 103(48):9891–9898.
3. Peschke M, Blades AT, Kebarle P (1998) Hydration energies and entropies for  $Mg^{2+}$ ,  $Ca^{2+}$ ,  $Sr^{2+}$ , and  $Ba^{2+}$  from gas-phase ion-water molecule equilibria determinations. *J Phys Chem A* 102(48):9978–9985.

**Table S2. Effect of  $T \rightarrow S$  substitutions on the structures of ion complexes**

| rmsd, Å                      | A $\equiv$ Na <sup>+</sup> | A $\equiv$ K <sup>+</sup> | A $\equiv$ Ba <sup>2+</sup> |
|------------------------------|----------------------------|---------------------------|-----------------------------|
| Between $AT_4$ and $AT_3S$   | 0.13                       | 0.46                      | 0.85                        |
| Between $AT_4$ and $AT_2S_2$ | 0.13 (0.14)                | 0.69 (0.02)               | 0.84 (0.96)                 |
| Between $AT_4$ and $AT_1S_3$ | 0.14                       | 0.64                      | 0.96                        |
| Between $AT_4$ and $AS_4$    | 0.03                       | 0.02                      | 1.01                        |

In the calculation of the rmsd between two ion complexes, only nonhydrogen atoms are considered. Note that two simultaneous  $T \rightarrow S$  substitutions can be introduced in two different ways. In one case, the substitutions are made on adjacent threonine residues, and in the other case, the substitutions are made on nonadjacent threonine residues. The numbers in brackets correspond to substitutions made on adjacent threonine residues. We find that these substitutions result in only minor configurational changes. Although the configurational changes are generally higher in the case of  $Ba^{2+}$  complexes, they do not correspond to any changes in binding topology or geometry (Fig. S3).

**Table S3. Changes in single point energy  $\Delta E$  and free energy  $\Delta G$  associated with the substitution reaction,  $BaT_4 + 4S \rightleftharpoons BaS_4 + 4T$ , estimated with and without vdW contributions**

| Substitution reaction energy                     | PBE0 | PBE0+vdW | PBE0+mbd |
|--------------------------------------------------|------|----------|----------|
| $\Delta E = E_{BaS_4} + 4E_T - E_{BaT_4} - 4E_S$ | 3.1  | 5.2      | 4.9      |
| $\Delta G = G_{BaS_4} + 4G_T - G_{BaT_4} - 4G_S$ | 2.5  | 6.9      | —        |

The vdW contributions are evaluated in two different ways: (i) using a pairwise approximation (1), denoted by PBE0+vdw, and (ii) using a many-body correction scheme (2), denoted by PBE0+mbd. Free energies are evaluated at a temperature of 298 K and a pressure of 1 atm. All energies are in units of kcal/mol. We find that although the contributions of many-body vdW interaction terms to  $\Delta E$  are small (0.3 kcal/mol), dispersion contributes significantly to the energy differences associated with the substitution reaction.

1. Tkatchenko A, Scheffler M (2009) Accurate molecular van der Waals interactions from ground-state electron density and free-atom reference data. *Phys Rev Lett* 102(7):073005.
2. Tkatchenko A, DiStasio RA, Jr., Car R, Scheffler M (2012) Accurate and efficient method for many-body van der Waals interactions. *Phys Rev Lett* 108(23):236402.
